# Supplementary material for: Serine/threonine phosphatase PP2A is essential for optimal B cell function
Source: JCI journal article supplement (doi:10.1172/jci.insight.130655), 2020-03-11
Supplement: sd1 [file 1]

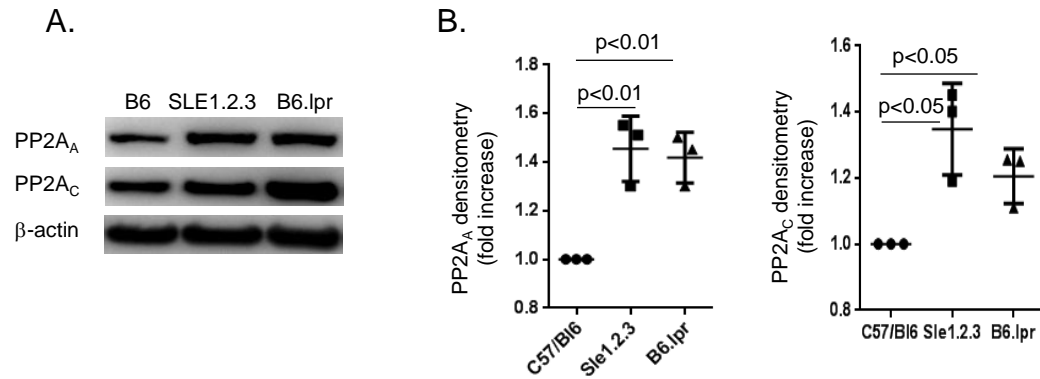

Supplementary Figure 1. Increased PP2A expression in B cells from lupus-prone mice.

- A. Western blot analysis on the expression of both scaffold (PP2A<sub>A</sub>) and catalytic (PP2A<sub>C</sub>) subunits in splenic B cells from indicated mice.
- B. Quantification of western blots (n=3).

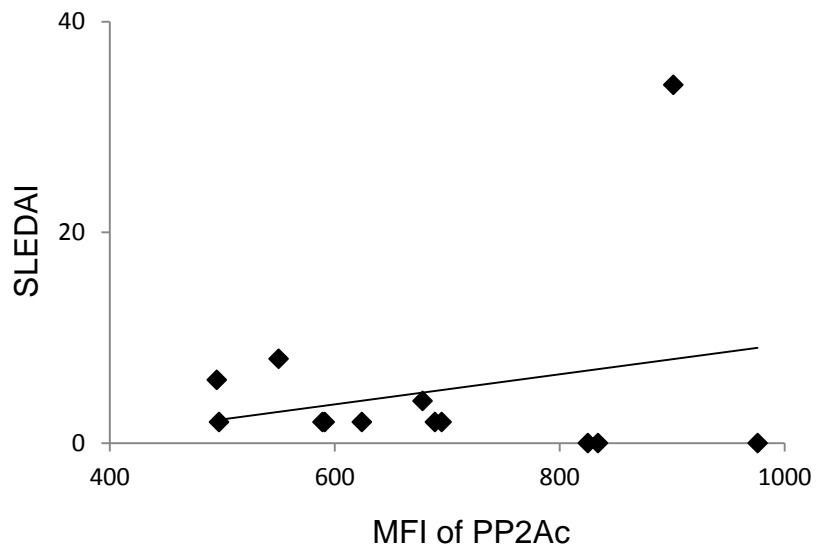

Supplementary Figure 2. Correlation between SLEDAI scores and mean fluorescence intensity (MFI) of PP2Ac in total circulating B cells from SLE patients.

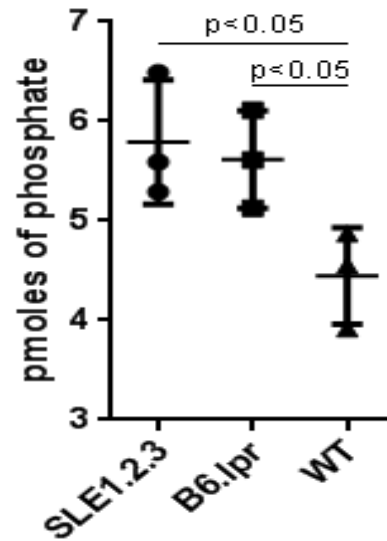

Supplementary Figure 3. Increased PP2A activity in B cells from lupus-prone mice.

PP2A phosphatase activity was quantified using a kit from R&D. The activity of PP2A is presented as the rate of phosphate release (pmol x 10<sup>2</sup>).

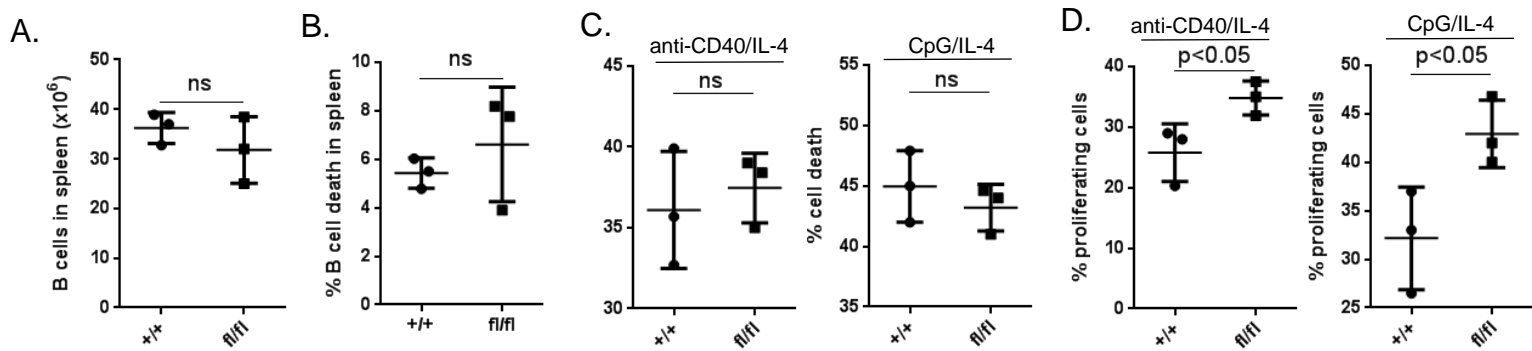

Supplementary Figure 4. Equal proliferation and surviving rates of B cells from *flox/flox* mice and control mice with or without indicated stimulations.



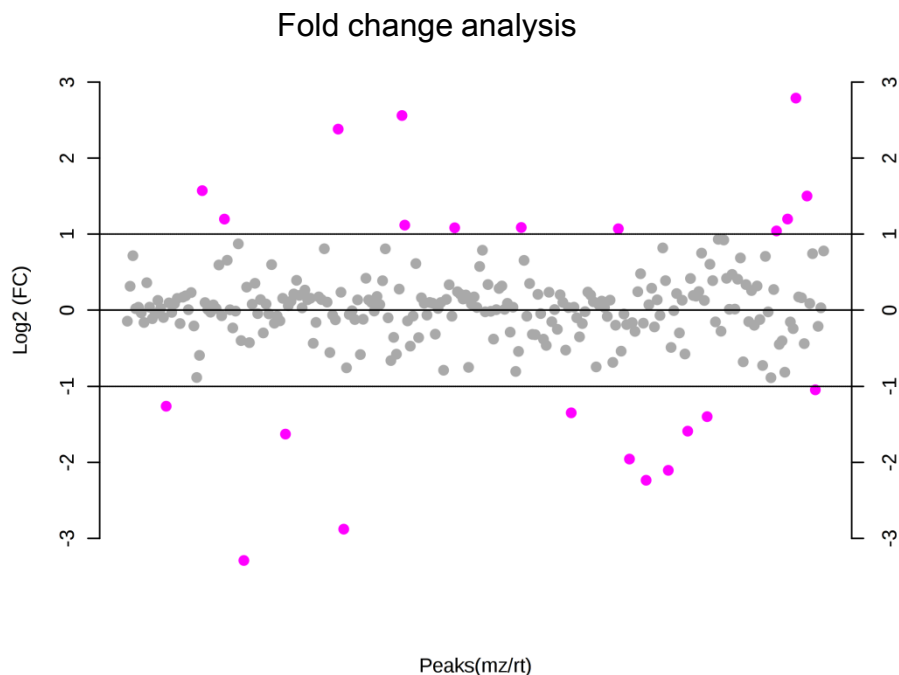

Pink dots represent >2 fold change metabolites (WT/KO).

|                                  | Fold Change |
|----------------------------------|-------------|
| phenylpyruvate                   | 0.10216     |
| deoxyinosine                     | 0.13593     |
| putrescine                       | 6.9171      |
| dCDP-nega                        | 5.9015      |
| thymidine                        | 5.2131      |
| N-carbamoyl-L-aspartate          | 0.21229     |
| N-acetyl-glutamate               | 0.23237     |
| Pyridoxamine                     | 0.25751     |
| glucono--lactone                 | 0.32335     |
| cystathionine                    | 0.33212     |
| acetylphosphate                  | 2.9753      |
| Nicotinamide Riboside            | 2.8328      |
| acadesine                        | 0.3791      |
| N-Acetylputrescine               | 0.3925      |
| nicotinate                       | 0.41686     |
| FAD                              | 2.2966      |
| Hydroxyphenylacetic acid         | 2.2955      |
| 5-phosphoribosyl-1-pyrophosphate | 2.173       |
| 4-aminobutyrate                  | 2.1266      |
| dATP-nega                        | 2.1208      |
| 2-Aminooctanoic acid             | 2.1019      |
| phosphocreatine                  | 0.48406     |
| NAD_posi                         | 2.0606      |

### Supplementary Figure 5. Targeted metabolomics analysis

Metabolites were extracted from cells and polar metabolomics profiling (303 metabolites) was performed by using Liquid Chromatography-Tandem Mass Spectroscopy (LC/MS). Metabolomics data was analyzed using MetaboAnalyst 4.0. Metabolites with  $\geq 2$ -fold changes between groups were shown.

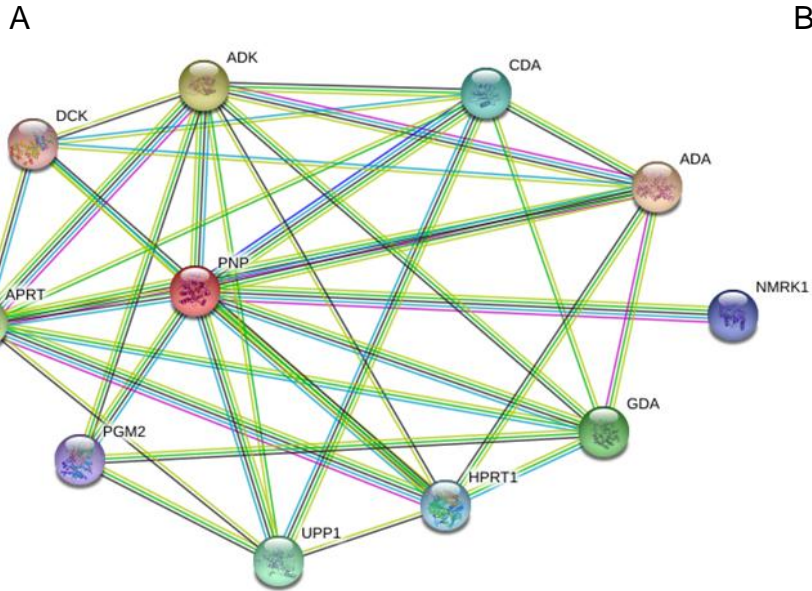

B

| Name                                     | p.value    | FDR      |
|------------------------------------------|------------|----------|
| <i>Adenine phosphoribosyltransferase</i> | 0.00014769 | 0.023926 |
| <i>Adenosine kinase</i>                  | 4.67E-12   | 8.55E-10 |
| <i>Deoxycytidine kinase</i>              | 0.00029112 | 0.046675 |
| <i>Phosphoglucomutase-2</i>              | 7.12E-13   | 1.26E-10 |
| <i>Purine nucleoside phosphorylase</i>   | 3.46E-13   | 8.93E-11 |

Supplementary Figure 6. Alteration of PNP pathway in B cells with PP2Aa deficiency.

A. Predicted proteins directly interacting with PNP on STRING database.

B. Genes on PNP pathways with significant alterations ( $P < 0.05$ ,  $t$ -test) obtained from RNA-seq data. FDR: false discovery rate.
